# Supplementary material for: Effective improvement of the photovoltaic performance of black dye sensitized quasi-solid-state solar cells
Source: Royal Society of Chemistry journal article supplement (doi:10.1039/c4ra04017a), 2014-01-01
Supplement: c4ra04017a1.pdf [file c4ra04017a1.pdf]

## Supporting Information

# Effective Improvement of the Photovoltaic Performance of Black Dye Sensitized Quasi-Solid-State Solar Cells

Shuai Chang,<sup>a</sup> King Young Wong,<sup>a</sup> Xudong Xiao<sup>a</sup> and Tao Chen<sup>\*a</sup>

*Department of Physics, The Chinese University of Hong Kong, Shatin, Hong Kong, China.*

*Fax: 852- 2603 5204; Tel: 852-3943 6278*

*E-mail: taochen@phy.cuhk.edu.hk (T. C)*

## **Fabrication and characterization of porphyrin and PT sensitized quasi-solid-state DSSCs**

ZnP was synthesized according to our reported method.<sup>1</sup> The ZnP dye (0.2 mM) was dissolved in acetonitrile/tert-butyl alcohol (1:1, v/v) solution with an addition of 10 mM chenodeoxycholic acid (CDCA). For ZnP dye loading onto anode films (denoted as device **5**), the electrode was immersed into the dye bath for 10 h. For the ZnP and PT cosensitized device (device **6**), the electrode was firstly soaked in ZnP solution for 10 h, and then it was transferred into PT solution for 4 h. These electrodes were then rinsed with ethanol to remove the non-adsorbed dyes and dried in air. The electrolyte injection, sealing and characterization procedure of these devices are the same with the part in the experimental section in the main text. A device using cocktail dye loading method was also made for comparison (device **7**). Its IPCE in Fig S1b shows much lower conversion intensity around 570-760nm comparing to that at the same range of device **5** and **6**.

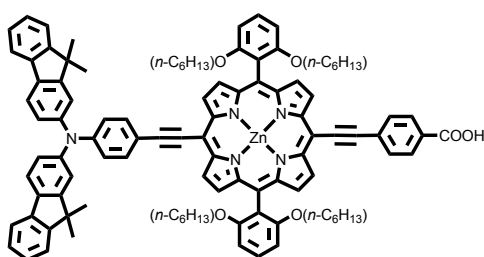

Scheme 1. Molecular structure of as-synthesized porphyrin (ZnP).

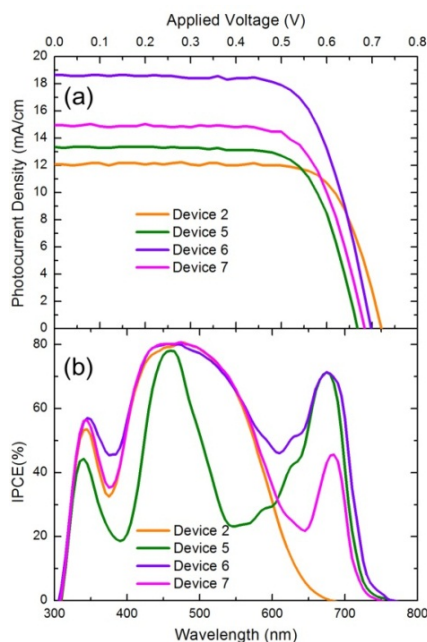

**Fig. S1.** (a) Photocurrent-voltage characteristics and (b) the corresponding incident photon-to-electron conversion efficiency spectra of device 5, 6 and 7; the IPCE spectra of device 2 is also depicted for reference.

**Table S1**  $J_{sc}$ ,  $V_{oc}$ , fill factor ( $FF$ ) and PCE ( $\eta$ ) parameters of device 2, 5, 6 and 7.

| Device <sup>[1]</sup> | Dye     | Dye-loading strategy | $J_{sc}$ (mA/c m <sup>2</sup> ) | $V_{oc}$ (V) | $FF$ (%) | $\eta$ (%) |
|-----------------------|---------|----------------------|---------------------------------|--------------|----------|------------|
| 2                     | PT      | N/A                  | 12.08                           | 0.721        | 75.1     | 6.5        |
| 5                     | ZnP     | N/A                  | 13.36                           | 0.668        | 72.3     | 6.5        |
| 6                     | ZnP +PT | Stepwise             | 18.61                           | 0.698        | 70.5     | 9.2        |
| 7                     | ZnP +PT | Cocktail             | 14.97                           | 0.683        | 71.4     | 7.3        |

<sup>[1]</sup> the effective areas of all the devices are 0.196 cm<sup>2</sup>;

**Table S2.** Simulated device parameters from the EIS data in Fig. 3a in main text

| Device | $R_{CT}$ ( $\Omega$ ) | $f$ (Hz) | $\tau$ (ms) |
|--------|-----------------------|----------|-------------|
| 1      | 287.2                 | 19.29    | 8.25        |
| 2      | 1592.6                | 3.70     | 43.01       |
| 3      | 441.3                 | 10.52    | 15.13       |

1. S. Chang, H. Wang, Y. Hua, Q. Li, X. Xiao, W.-K. Wong, W. Y. Wong, X. Zhu and T. Chen, *J. Mater. Chem. A*, 2013, **1**, 11553.
